# Supplementary material
Source: MDPI journal article supplement (https://www.mdpi.com/2073-4344/10/9/1083)
Supplement: s1 [file s1]

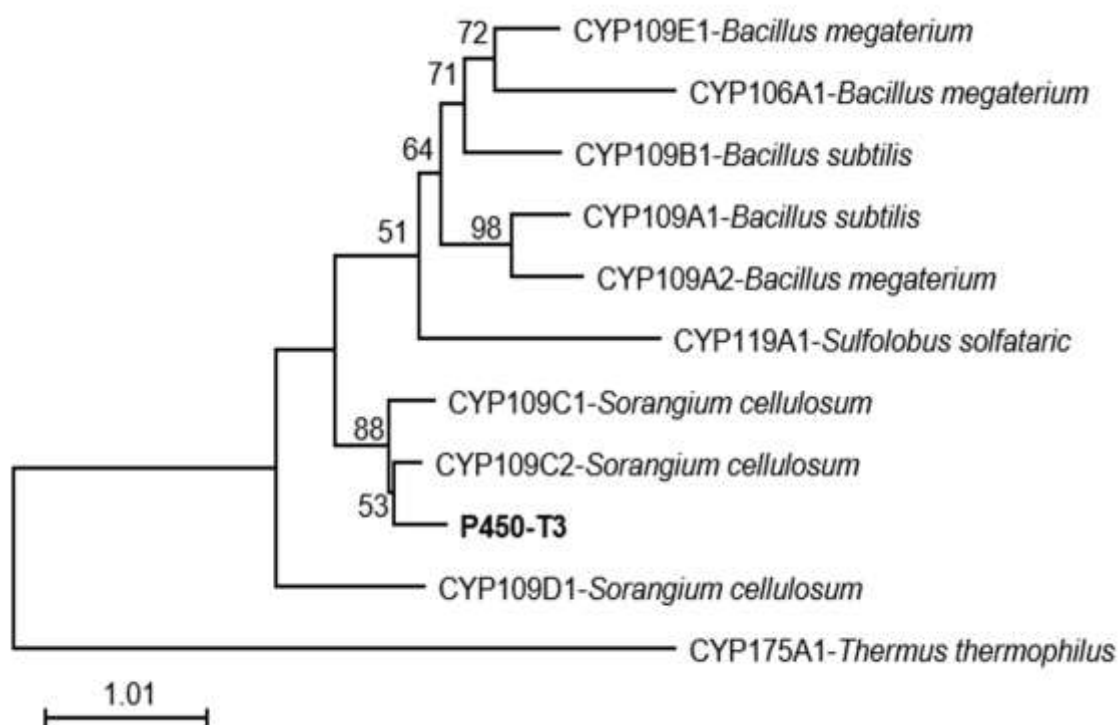

**Figure S1.** Phylogenetic tree of P450-T3 in the cluster of the CYP109 family. Evolutionary analyses were conducted in MEGA X.

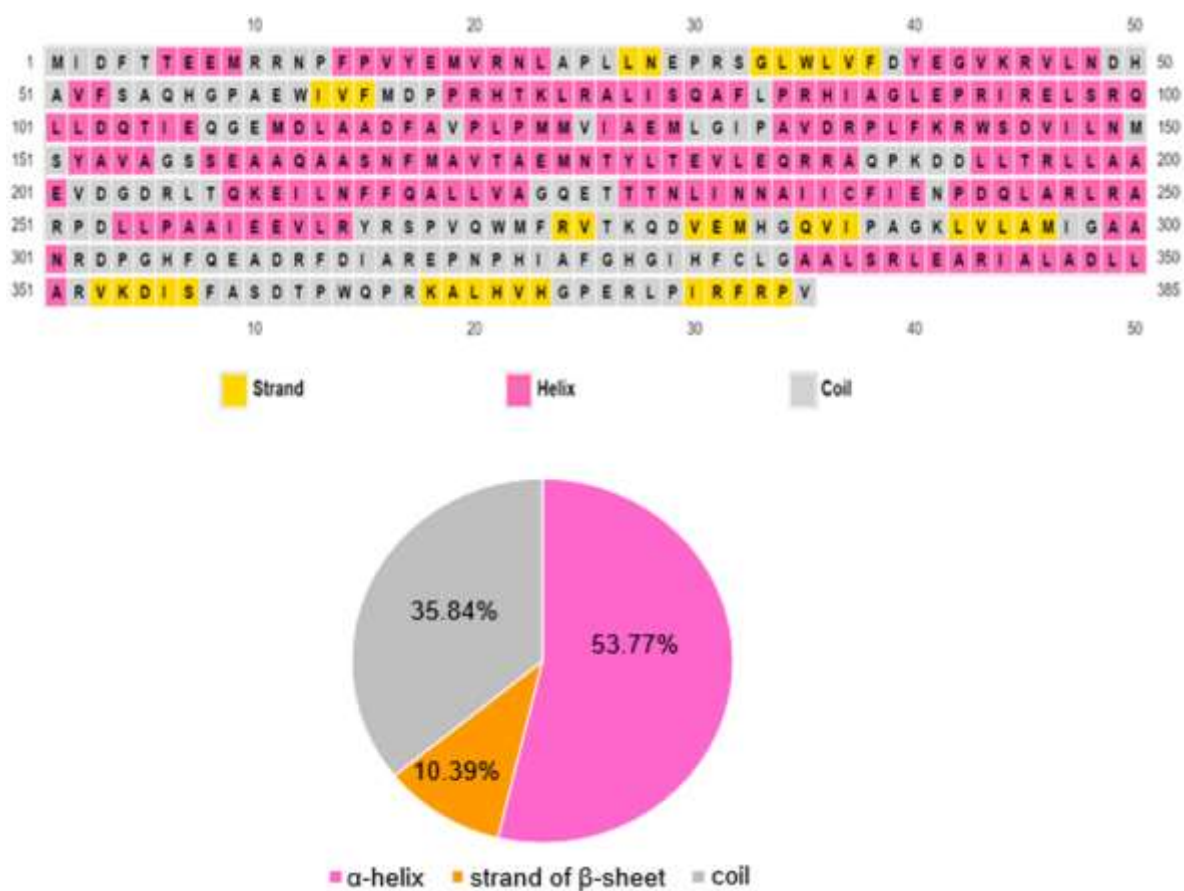

**Figure S2.** Prediction of secondary structures of P450-T3 using the PRIPRED tool.
